# Supplementary material for: Spatial and Quantitative Analysis of Tumor-Associated Macrophages: Intratumoral CD163-/PD-L1+ TAMs as a Marker of Favorable Clinical Outcomes in Triple-Negative Breast Cancer
Source: MDPI journal article supplement (doi:10.3390/ijms232113235), 2022-10-31
Supplement: s1 [file s1]

Supplementary Table S3. Proportions of iTAMs classified by single markers.

| Marker | Subtype | Min(%) | Median(%) | Max(%) | SD   |
|--------|---------|--------|-----------|--------|------|
| CD68   | ER/PR   | 0      | 4         | 62.1   | 11.6 |
|        | HER2    | 0      | 7         | 88.3   | 18.6 |
|        | TN      | 0      | 4.6       | 65.8   | 18.2 |
| CD163  | ER/PR   | 0.1    | 1.3       | 14     | 3.3  |
|        | HER2    | 0      | 1.9       | 41.7   | 7.5  |
|        | TN      | 0      | 2.7       | 70.3   | 13.4 |
| PDL1   | ER/PR   | 0      | 1         | 57.6   | 7.4  |
|        | HER2    | 0      | 4.1       | 66.8   | 14.3 |
|        | TN      | 0      | 4.4       | 97.8   | 25.2 |
| CD20   | ER/PR   | 0      | 0.1       | 1.9    | 0.6  |
|        | HER2    | 0      | 0.3       | 15.8   | 2.3  |
|        | TN      | 0      | 0.1       | 12.4   | 2.6  |
