# Supplementary material for: Spatial and Quantitative Analysis of Tumor-Associated Macrophages: Intratumoral CD163-/PD-L1+ TAMs as a Marker of Favorable Clinical Outcomes in Triple-Negative Breast Cancer
Source: MDPI journal article supplement (doi:10.3390/ijms232113235), 2022-10-31
Supplement: s1 [file s1]

Supplementary Table S1. Proportions of sTAMs classified by single marker.

| Marker | Subtype | Min(%) | Median(%) | Max(%) | SD   |
|--------|---------|--------|-----------|--------|------|
| CD68   | ER/PR   | 1      | 17.4      | 98.8   | 17.2 |
|        | HER2    | 4.8    | 20.4      | 82.9   | 17.8 |
|        | TN      | 0.4    | 17        | 63.4   | 14.6 |
| CD163  | ER/PR   | 0.3    | 15.5      | 50.9   | 10.5 |
|        | HER2    | 1.9    | 15.7      | 63.6   | 12.6 |
|        | TN      | 2.2    | 20.5      | 72.4   | 14.6 |
| PDL1   | ER/PR   | 0      | 0.6       | 22.6   | 3.3  |
|        | HER2    | 0      | 0.4       | 14.7   | 2.5  |
|        | TN      | 0      | 0.5       | 16     | 3.4  |
| CD20   | ER/PR   | 0      | 1.3       | 36.4   | 7.3  |
|        | HER2    | 0      | 3.9       | 27.5   | 5.5  |
|        | TN      | 0      | 2.4       | 31.7   | 6.4  |
