# Supplementary material for: Spatial and Quantitative Analysis of Tumor-Associated Macrophages: Intratumoral CD163-/PD-L1+ TAMs as a Marker of Favorable Clinical Outcomes in Triple-Negative Breast Cancer
Source: MDPI journal article supplement (doi:10.3390/ijms232113235), 2022-10-31
Supplement: s1 [file s1]

Supplementary Table S5. Proportions of cancer cells among breast cancer subtypes

| Marker       | Subtype | Min(%) | Median(%) | Max(%) | SD   |
|--------------|---------|--------|-----------|--------|------|
| CK+PDL1+HLA- | ER/PR   | 0      | 0         | 0      | 0    |
|              | HER2    | 0      | 0         | 0      | 0    |
|              | TN      | 0      | 0         | 0.4    | 0    |
| CK+PDL1-HLA+ | ER/PR   | 2.8    | 72        | 92.7   | 19.8 |
|              | HER2    | 16.7   | 69.4      | 91.1   | 18.1 |
|              | TN      | 0.2    | 53.5      | 85.9   | 24.2 |
| CK+PDL1+HLA+ | ER/PR   | 0      | 0         | 6.2    | 0.8  |
|              | HER2    | 0      | 0.1       | 5.4    | 0.9  |
|              | TN      | 0      | 0.1       | 22.3   | 4.2  |
