# Supplementary material for: Spatial and Quantitative Analysis of Tumor-Associated Macrophages: Intratumoral CD163-/PD-L1+ TAMs as a Marker of Favorable Clinical Outcomes in Triple-Negative Breast Cancer
Source: MDPI journal article supplement (doi:10.3390/ijms232113235), 2022-10-31
Supplement: s1 [file s1]

Supplementary Table S4. Proportions of iTAMs classified by multiple markers.

| Marker      | Subtype | Min(%) | Median(%) | Max(%) | SD  |
|-------------|---------|--------|-----------|--------|-----|
| CD68/CD163  | ER/PR   | 0      | 0.1       | 7.2    | 1.1 |
|             | HER2    | 0      | 0.3       | 8.4    | 1.7 |
|             | TN      | 0      | 0.2       | 11.9   | 2.3 |
| CD163/PD-L1 | ER/PR   | 0      | 0.2       | 17.9   | 2.5 |
|             | HER2    | 0      | 0.6       | 32.8   | 6.1 |
|             | TN      | 0      | 1.2       | 61.7   | 12  |
| CD68/PD-L1  | ER/PR   | 0      | 0.2       | 25.4   | 3.6 |
|             | HER2    | 0      | 0.9       | 51     | 7.8 |
|             | TN      | 0      | 0.6       | 26.6   | 6.5 |
