# Supplementary material for: Spatial and Quantitative Analysis of Tumor-Associated Macrophages: Intratumoral CD163-/PD-L1+ TAMs as a Marker of Favorable Clinical Outcomes in Triple-Negative Breast Cancer
Source: MDPI journal article supplement (doi:10.3390/ijms232113235), 2022-10-31

**Supplementary Figure S1. Number of positive cells for single and multiple markers of stromal TAMs (sTAMs), immune modification, and B-cell markers stratified by ER/PR, HER2, and TN subtypes.**

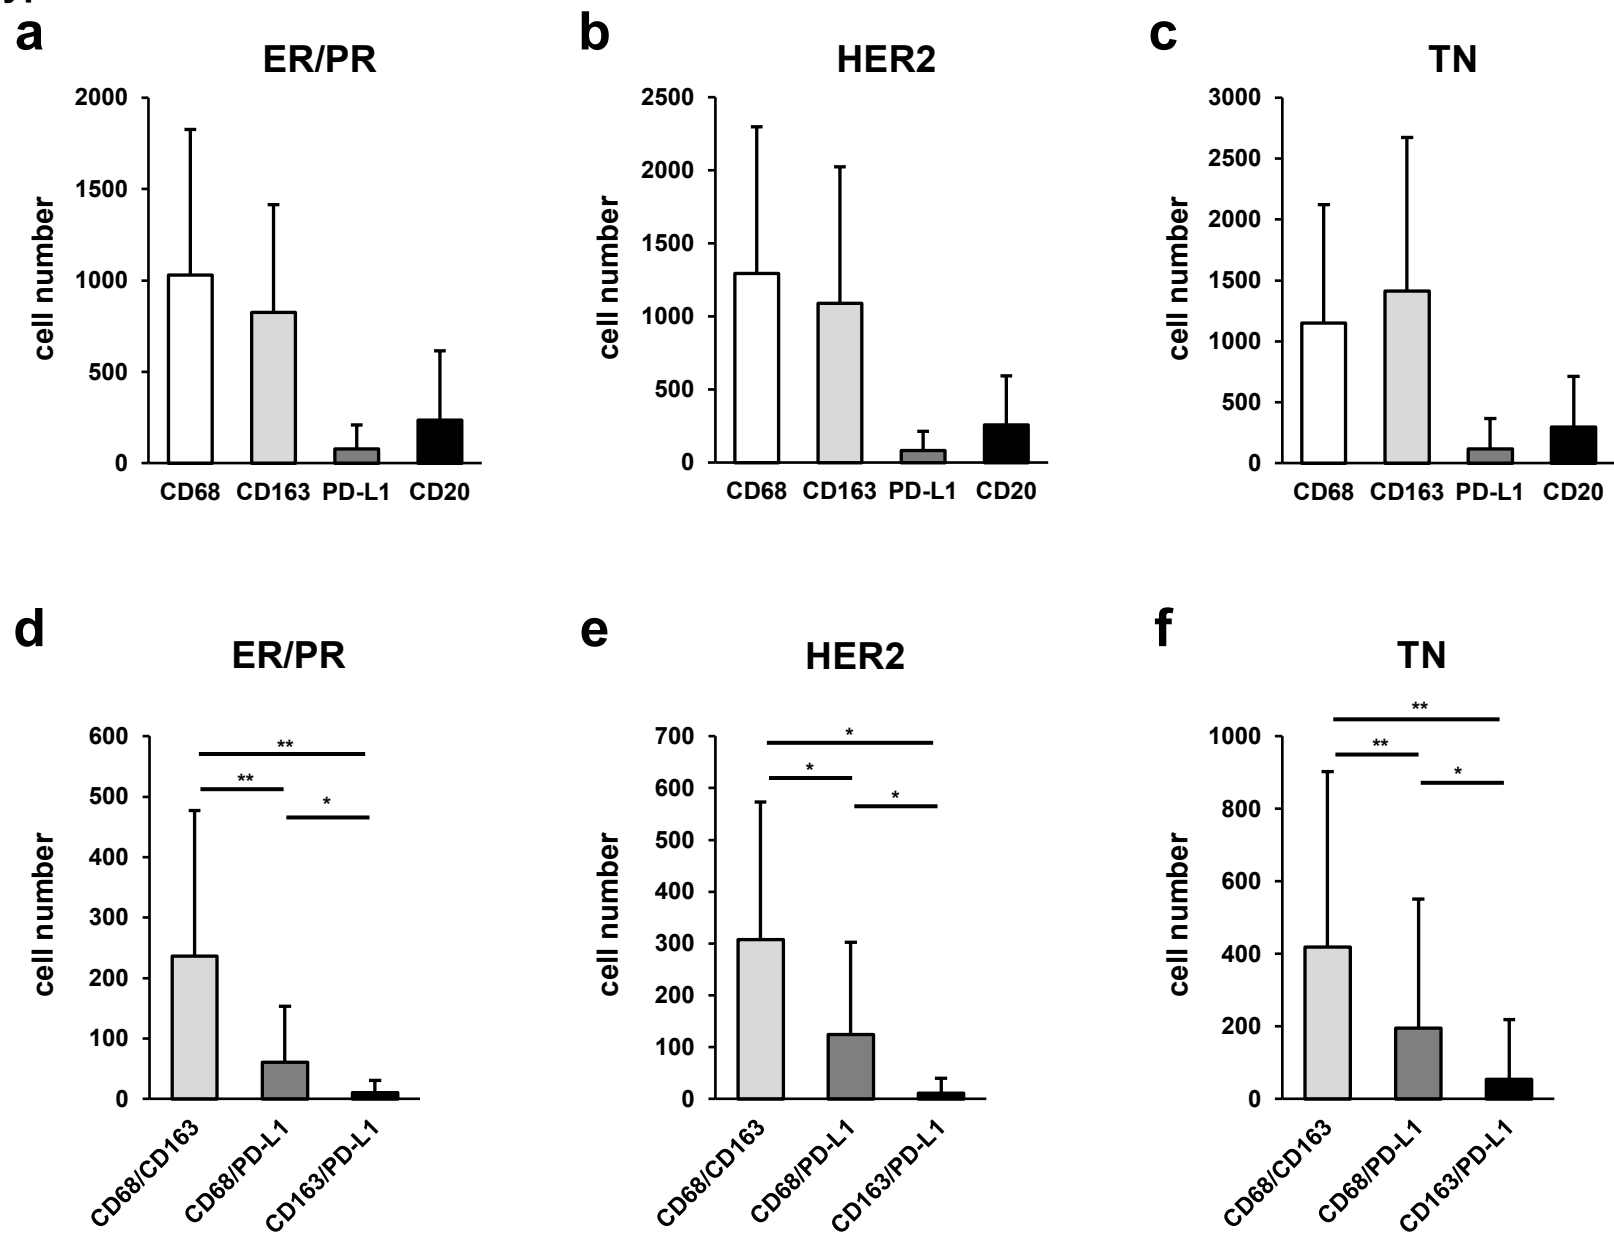

Supplement: s1 [file s1]
