# Supplementary material for: Spatial and Quantitative Analysis of Tumor-Associated Macrophages: Intratumoral CD163-/PD-L1+ TAMs as a Marker of Favorable Clinical Outcomes in Triple-Negative Breast Cancer
Source: MDPI journal article supplement (doi:10.3390/ijms232113235), 2022-10-31

**Supplementary Figure S3. Kaplan–Meier analysis for recurrence-free survival categorized by the number of stromal and intratumoral TAMs (sTAMs and iTAMs), immune modification, and B-cell-marker-positive cells in triple-negative cases.**

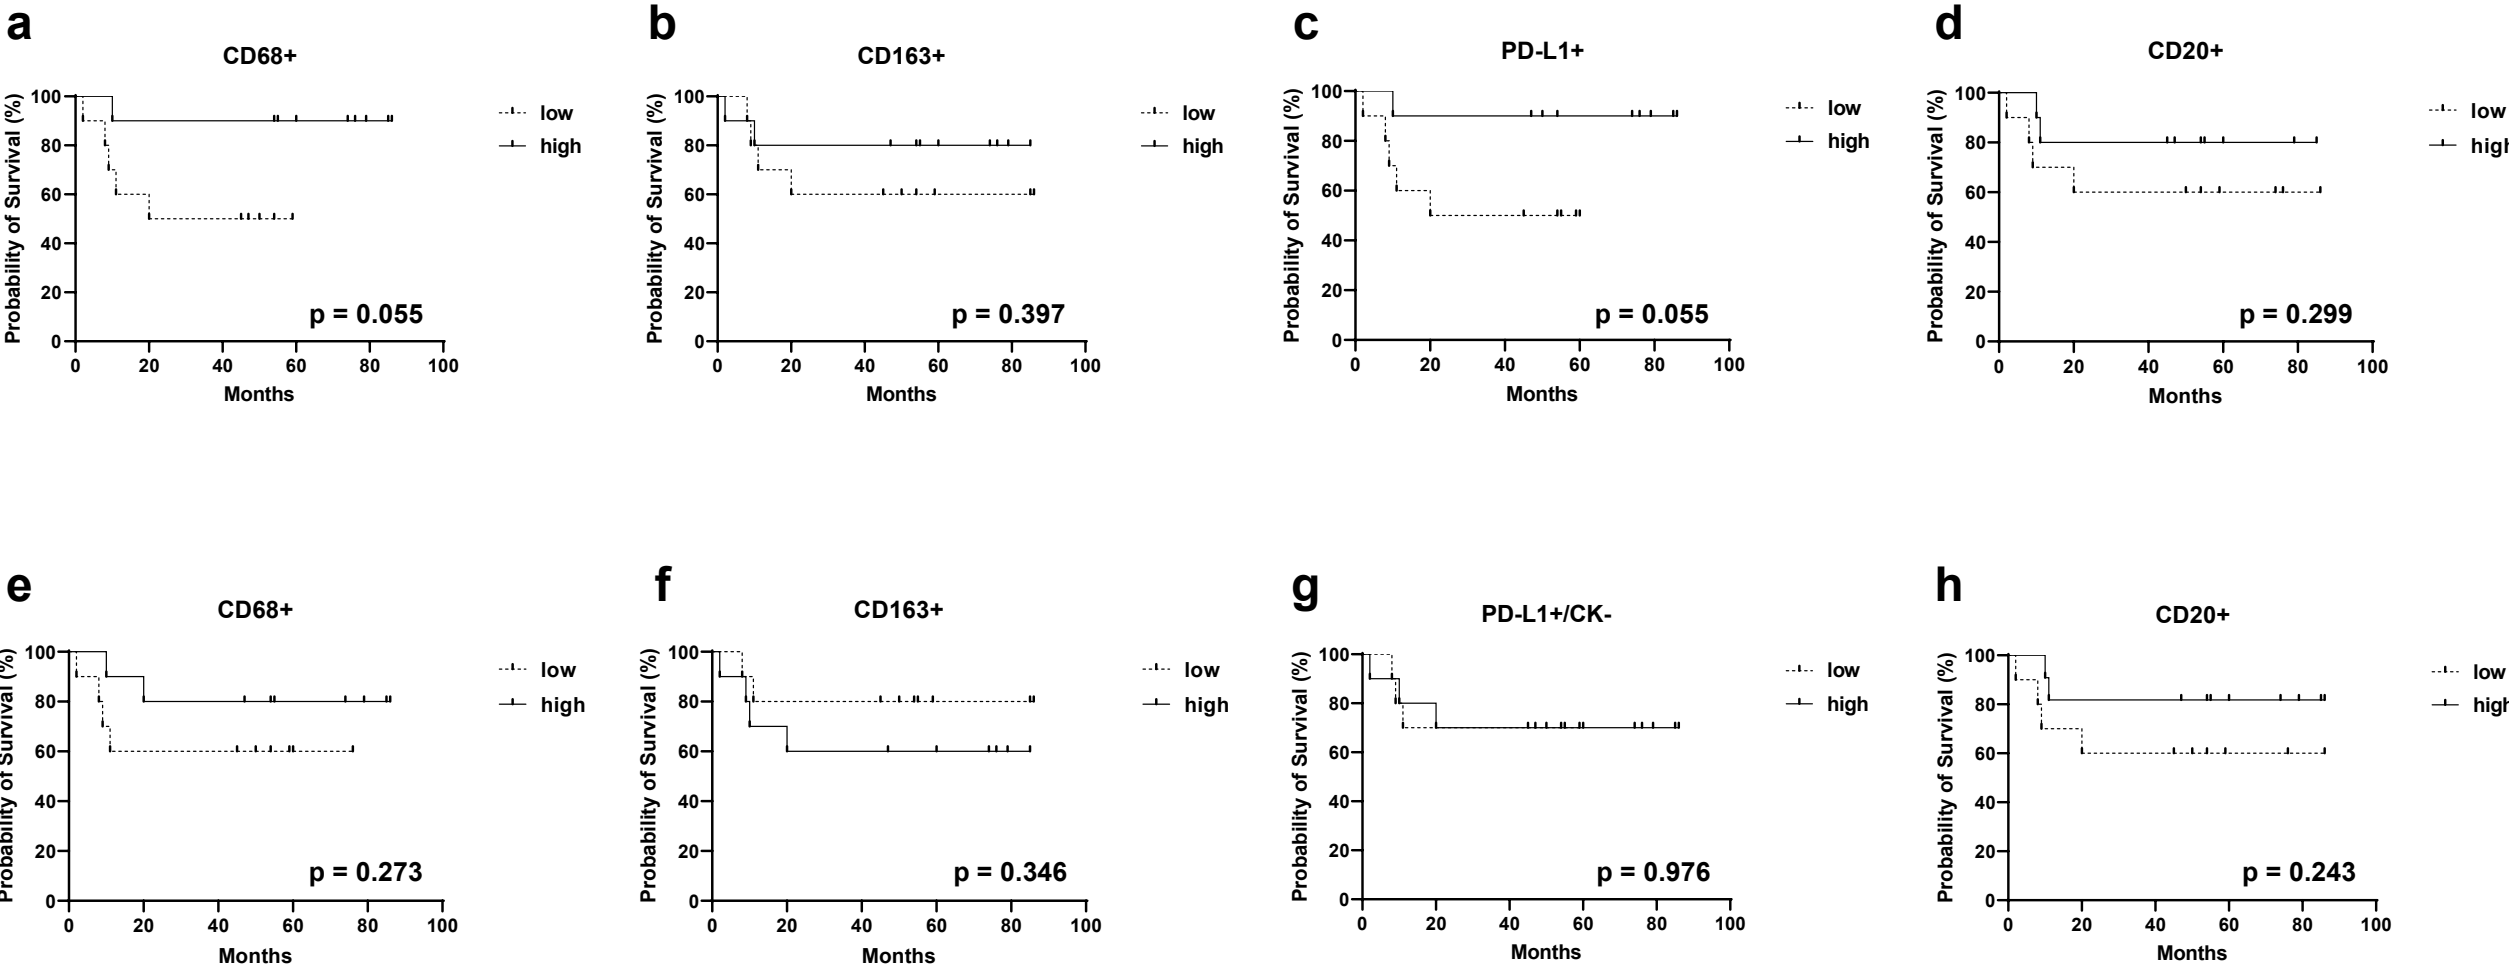

Supplement: s1 [file s1]
