# Supplementary material for: Spatial and Quantitative Analysis of Tumor-Associated Macrophages: Intratumoral CD163-/PD-L1+ TAMs as a Marker of Favorable Clinical Outcomes in Triple-Negative Breast Cancer
Source: MDPI journal article supplement (doi:10.3390/ijms232113235), 2022-10-31
Supplement: s1 [file s1]

### **Supplementary Figure S1.**

The average number of positive cells for single sTAM markers in each subtype (a) ER/PR, (b) HER2, and TN and multiple sTAM markers in each subtype (d) ER/PR (\* and \*\* indicate  $p = 0.002$  and  $p < 0.001$ , respectively), (e) HER2 (\* indicates  $p < 0.001$ ), and (f) TN (\* and \*\* indicate  $p = 0.002$  and  $p < 0.001$ , respectively) per 1 mm<sup>2</sup> at 5 locations;  $p$ -values were calculated using one-way ANOVA test and Tukey's multiple comparison test. Error bars represent standard deviation.

### **Supplementary Figure S2.**

The average number of positive cells for single iTAM markers in each subtype (a) ER/PR, (b) HER2, and (c) TN and multiple iTAM markers in each subtype (d) ER/PR+ (\* and \*\* indicate  $p = 0.010$  and  $p < 0.001$ , respectively), (e) HER2 (\* and \*\* indicate  $p = 0.029$  and  $p = 0.002$ , respectively), and (f) TN (\* indicates  $p = 0.001$ ) per 1 mm<sup>2</sup> at 5 locations;  $p$ -values were calculated using one-way ANOVA test and Tukey's multiple comparison test. Error bars represent standard deviation.

### **Supplementary Figure S3.**

Each TAM- and B-cell-marker-positive cell subpopulation was classified into "low" or "high": (a) CD68+ sTAM low, <950 cells; high, ≥950 cells; (b) CD163+ sTAM low, <1000 cells; high, ≥1000 cells; (c) PD-L1+ sTAM low, <50 cells; high, ≥50 cells; (d) CD20+ stromal B-cell low, <200 cells; high, ≥200 cells; (e) CD68+ iTAM low, <300 cells; high, ≥300 cells; (f) CD163+ iTAM low, <200 cells; high, ≥200 cells; (g) PD-L1+ iTAM low, <14 cells; high, ≥14 cells; (h) CD20+ intratumoral B-cell low, <25 cells; high, ≥25 cells.
