# Supplementary material for: Spatial and Quantitative Analysis of Tumor-Associated Macrophages: Intratumoral CD163-/PD-L1+ TAMs as a Marker of Favorable Clinical Outcomes in Triple-Negative Breast Cancer
Source: MDPI journal article supplement (doi:10.3390/ijms232113235), 2022-10-31
Supplement: s1 [file s1]

Supplementary Table S2. Proportions of sTAMs classified by multiple markers.

| Marker      | Subtype | Min(%) | Median(%) | Max(%) | SD  |
|-------------|---------|--------|-----------|--------|-----|
| CD68/CD163  | ER/PR   | 0      | 3.9       | 38.6   | 5.1 |
|             | HER2    | 0.4    | 4.3       | 16.5   | 4.2 |
|             | TN      | 0      | 5.4       | 33.7   | 6.3 |
| CD68/PD-L1  | ER/PR   | 0      | 0.7       | 13.6   | 1.9 |
|             | HER2    | 0      | 1         | 12.4   | 2.5 |
|             | TN      | 0      | 1.4       | 23     | 4.2 |
| CD163/PD-L1 | ER/PR   | 0      | 0.1       | 2.4    | 0.4 |
|             | HER2    | 0      | 0         | 2.9    | 0.4 |
|             | TN      | 0      | 0.1       | 12.8   | 2   |
